# Supplementary material for: Resolving Discrepant Findings on ANGPTL8 in β-Cell Proliferation: A Collaborative Approach to Resolving the Betatrophin Controversy
Source: PLoS One. 2016 Jul 13;11(7):e0159276. doi: 10.1371/journal.pone.0159276 (PMC4943640; doi:10.1371/journal.pone.0159276)
Supplement: S4 Table — (top panel) Total β-cells counted for Ki67, total Ki67+ insulin+ DAPI+ cells, and Ki67+ β-cells (% of total insulin+ cells) for the tail pancreas. (bottom panel) Total β-cells counted, total EdU+ insulin+ DAPI+ cells, and EdU+ β-cells (% of total insulin+ cells). 10-week-old CD1 male mice injected with buffer with or without EdU, or injected with MBP or MBP+hBT receiving EdU. (XLSX) [file pone.0159276.s004.xlsx]

## Sheet: Suppl Table 4
	Supplemental Table 4. Individual data for β-cell proliferation analysis from all three labs for ANGPTL8 treatment studies. (top panel) Total β-cells counted for Ki67, total Ki67+ insulin+ DAPI+ cells, and Ki67+ β-cells (% of total insulin+ cells) for the tail pancreas. (bottom panel) Total β-cells counted, total EdU+ insulin+ DAPI+ cells, and EdU+ β-cells (% of total insulin+ cells). 10-week-old …
	Animal ID#	Treatment	Slide #	Melton Lab			Slide #	Kushner Lab			Slide #	Peng Lab
			Slide #	Total β-Cells	Ki67+ Cells	% Ki67+ Cells	Slide #	Total β-Cells	Ki67+ Cells	% Ki67+ Cells	Slide #	Total β-Cells	Ki67+ Cells	% Ki67+ Cells
	CM7710	Buffer, EdU	2, 5	941	1	0.10627	1, 4	2529	10	0.395413	3	NA	NA	NA
	CM7711	Buffer, EdU	2, 5	4556	16	0.351185	1, 4	12047	16	0.132813	3	5212	16	0.306984
	CM7712	Buffer, EdU	2, 5	974	12	1.23203	1, 4	5821	61	1.04793	3	2561	16	0.624756
	CM7713	Buffer, EdU	2, 5	2423	54	2.22864	1, 4	6931	56	0.807964	3	10914	121	1.10867
	CM7714	Buffer, EdU	2, 5	2869	34	1.18508	1, 4	3447	20	0.580215	3	2213	16	0.723
	CM7715	Buffer	2, 5	2462	17	0.690496	1, 4	5139	38	0.739443	3	4497	27	0.6004
	CM7716	Buffer	2, 5	2028	33	1.62722	1, 4	3542	44	1.24224	3	3040	15	0.493421
	CM7717	Buffer	2, 5	1650	16	0.969697	1, 4	7196	45	0.625347	3	3604	33	0.915649
	CM7718	Buffer	2, 5	3383	28	0.827668	1, 4	2746	8	0.291333	3	1264	8	0.632911
	CM7719	Buffer	2, 5	1601	22	1.37414	1, 4	3301	37	1.12087	3	NA	NA	NA
	CM7721	MBP	2, 5	2673	31	1.15975	1, 4	3630	32	0.881543	3	1887	28	1.48384
	CM7722	MBP	2, 5	1630	23	1.41104	1, 4	4509	23	0.510091	3	897	6	0.668896
	CM7725	MBP	2, 5	3093	29	0.937601	1, 4	5241	13	0.248044	3	1997	11	0.550826
	CM7726	MBP	2, 5	3370	18	0.534125	1, 4	6478	9	0.138932	3	4513	17	0.37669
	CM7729	MBP	2, 5	1877	18	0.958977	1, 4	1553	2	0.128783	3	930	3	0.322581
	CM7731	MBP	2, 5	3871	21	0.542495	1, 4	7123	6	0.0842342	3	3535	12	0.339463
	CM7733	MBP	2, 5	3295	50	1.51745	1, 4	4708	43	0.913339	3	2260	40	1.76991
	CM7734	MBP	2, 5	3571	26	0.728087	1, 4	10311	36	0.349142	3	4879	29	0.594384
	CM7735	MBP	2, 5	3920	51	1.30102	1, 4	8967	75	0.8364	3	4218	33	0.782361
	CM7737	MBP	2, 5	3705	37	0.99865	1, 4	6221	48	0.77158	3	4484	47	1.04817
	CM7720	MBP+hBT	2, 5	2722	33	1.21234	1, 4	3275	6	0.183206	3	1295	18	1.38996
	CM7723	MBP+hBT	2, 5	3424	18	0.525701	1, 4	9078	54	0.594845	3	1897	26	1.37059
	CM7724	MBP+hBT	2, 5	3216	38	1.18159	1, 4	3614	13	0.359712	3	1527	24	1.57171
	CM7727	MBP+hBT	2, 5	3261	47	1.44128	1, 4	10049	30	0.298537	3	3179	72	2.26486
	CM7728	MBP+hBT	2, 5	6124	87	1.42064	1, 4	8244	25	0.303251	3	4117	62	1.50595
	CM7730	MBP+hBT	2, 5	3177	45	1.41643	1, 4	8288	36	0.434363	3	4210	77	1.82898
	CM7732	MBP+hBT	2, 5	4398	98	2.22829	1, 4	7123	29	0.407132	3	3444	65	1.88734
	CM7736	MBP+hBT	2, 5	3285	61	1.85693	1, 4	11023	43	0.390093	3	9505	104	1.09416
	CM7738	MBP+hBT	2, 5	3887	62	1.59506	1, 4	10249	35	0.341497	3	7375	140	1.89831
	CM7739	MBP+hBT	2, 5	3812	22	0.577125	1, 4	8390	28	0.333731	3	4275	73	1.7076
	All Samples - Average			3039.93	34.9333	1.1379		6359.1	30.7	0.516401		3704.61	40.6786	1.06651
	All Samples - Standard Deviation			1110.73	21.6905	0.51157		2856.04	18.3212	0.316719		2385.63	35.9053	0.578738
	All Samples - Standard Error			202.791	3.96013	0.0933995		521.439	3.34497	0.0578247		435.555	6.55538	0.105663
	All Samples - Minimum			941	1	0.10627		1553	2	0.0842342		897	3	0.306984
	All Samples - Maximum			6124	98	2.22864		12047	75	1.24224		10914	140	2.26486
	All Samples - Median			3238.5	30	1.18334		6349.5	31	0.401273		3489.5	27.5	0.98191
	MBP - Average			3100.5	30.4	1.00892		5874.1	28.7	0.486209		2960	22.6	0.793712
	MBP - Standard Deviation			803.094	12.1308	0.34285		2552.32	22.8038	0.338102		1537.52	14.9607	0.495607
	MBP - Standard Error			253.961	3.83609	0.108419		807.113	7.21118	0.106917		486.206	4.73099	0.156725
	MBP+hBT - Average			3730.6	51.1	1.34554		7933.3	29.9	0.364637		4082.4	66.1	1.65195
	MBP+hBT - Standard Deviation			960.701	26.2486	0.519622		2627.61	13.7473	0.106917		2594.86	37.7284	0.335474
	MBP+hBT - Standard Error			303.8	8.30054	0.164319		830.922	4.34729	0.03381		820.567	11.9308	0.106086
	p value (t-test) MBP vs. MBP+hBT			0.128953	0.0361804	0.104465		0.0923621	0.888257	0.292606		0.254614	0.0032681	0.000256524
	Animal #	Treatment	Slide #	Melton Lab			Slide #	Kushner Lab			Slide #	Peng Lab
			Slide #	Total β-Cells	EdU+ Cells	% EdU+ Cells	Slide #	Total β-Cells	EdU+ Cells	% EdU+ Cells	Slide #	Total β-Cells	EdU+ Cells	% EdU+ Cells
	CM7710	Buffer, EdU	2, 5	941	1	0.10627	1, 4	2529	13	0.514037	6	NA	NA	NA
	CM7711	Buffer, EdU	2, 5	4556	25	0.548727	1, 4	12047	62	0.514651	6	6881	12	0.174393
	CM7712	Buffer, EdU	2, 5	974	31	3.18275	1, 4	5821	104	1.78663	6	2527	40	1.5829
	CM7713	Buffer, EdU	2, 5	2423	64	2.64135	1, 4	6931	107	1.54379	6	3307	41	1.23979
	CM7714	Buffer, EdU	2, 5	2869	31	1.08052	1, 4	3447	54.5802	1.58341	6	2572	37	1.43857
	CM7715	Buffer	2, 5	N/A	N/A	N/A	1, 4	N/A	N/A	N/A	6	NA	NA	NA
	CM7716	Buffer	2, 5	N/A	N/A	N/A	1, 4	N/A	N/A	N/A	6	NA	NA	NA
	CM7717	Buffer	2, 5	N/A	N/A	N/A	1, 4	N/A	N/A	N/A	6	NA	NA	NA
	CM7718	Buffer	2, 5	N/A	N/A	N/A	1, 4	N/A	N/A	N/A	6	NA	NA	NA
	CM7719	Buffer	2, 5	N/A	N/A	N/A	1, 4	N/A	N/A	N/A	6	NA	NA	NA
	CM7721	MBP	2, 5	2673	34	1.27198	1, 4	3630	61	1.68044	6	1809	27	1.49254
	CM7722	MBP	2, 5	1630	23	1.41104	1, 4	4509	40	0.887115	6	2051	19	0.926377
	CM7725	MBP	2, 5	3093	23	0.743615	1, 4	5241	49	0.934936	6	769	6	0.780234
	CM7726	MBP	2, 5	3370	13	0.385757	1, 4	6478	26	0.401358	6	2748	4	0.14556
	CM7729	MBP	2, 5	1877	23	1.22536	1, 4	1553	18	1.15905	6	450	3	0.666667
	CM7731	MBP	2, 5	3871	21	0.542495	1, 4	7123	65	0.912537	6	3329	14	0.420547
	CM7733	MBP	2, 5	3295	65	1.97269	1, 4	4708	77	1.63551	6	1052	16	1.52091
	CM7734	MBP	2, 5	3571	36	1.00812	1, 4	10311	121	1.1735	6	2966	21	0.708024
	CM7735	MBP	2, 5	3920	93	2.37245	1, 4	8967	169	1.88469	6	6386	122	1.91043
	CM7737	MBP	2, 5	3705	22	0.593792	1, 4	6221	109	1.75213	6	3160	25	0.791139
	CM7720	MBP+hBT	2, 5	2722	30	1.10213	1, 4	3275	50	1.52672	6	2253	38	1.68664
	CM7723	MBP+hBT	2, 5	3424	19	0.554907	1, 4	9078	115	1.2668	6	6639	64	0.964001
	CM7724	MBP+hBT	2, 5	3216	33	1.02612	1, 4	3614	56	1.54953	6	2099	9	0.428776
	CM7727	MBP+hBT	2, 5	3261	47	1.44128	1, 4	10049	157	1.56234	6	1589	19	1.19572
	CM7728	MBP+hBT	2, 5	6124	59	0.963423	1, 4	8244	100	1.213	6	3852	49	1.27207
	CM7730	MBP+hBT	2, 5	3177	47	1.47938	1, 4	8288	128	1.5444	6	9402	57	0.606254
	CM7732	MBP+hBT	2, 5	4398	37	0.841291	1, 4	7123	127	1.78296	6	1910	41	2.1466
	CM7736	MBP+hBT	2, 5	3285	44	1.33942	1, 4	11023	195	1.76903	6	7317	44	0.601339
	CM7738	MBP+hBT	2, 5	3887	41	1.0548	1, 4	10249	175	1.70748	6	4066	7	0.172159
	CM7739	MBP+hBT	2, 5	3812	35	0.918153	1, 4	8390	119	1.41836	6	2233	20	0.895656
	All Samples - Average			3202.96	35.88	1.19231		6753.96	91.9032	1.34818		3390.29	30.625	0.990304
	All Samples - Standard Deviation			1111.22	19.2858	0.714982		2887.63	50.3715	0.434843		2293.93	25.9897	0.559798
	All Samples - Standard Error			222.244	3.85717	0.142996		577.526	10.0743	0.0869686		468.246	5.30512	0.114268
	All Samples - Minimum			941	1	0.10627		1553	13	0.401358		450	3	0.14556
	All Samples - Maximum			6124	93	3.18275		12047	195	1.88469		9402	122	2.1466
	All Samples - Median			3285	33	1.0548		6931	100	1.54379		2660	23	0.911017
	MBP - Average			3100.5	35.3	1.15273		5874.1	73.5	1.24213		2472	25.7	0.936243
	MBP - Standard Deviation			803.094	24.824	0.641837		2552.32	47.0656	0.479281		1714.94	34.8777	0.543825
	MBP - Standard Error			253.961	7.85005	0.202967		807.113	14.8834	0.151562		542.313	11.0293	0.171972
	MBP+hBT - Average			3730.6	39.2	1.07209		7933.3	122.2	1.53406		4136	34.8	0.996921
	MBP+hBT - Standard Deviation			960.701	11.0232	0.285427		2627.61	46.5542	0.193313		2727.61	19.9655	0.599644
	MBP+hBT - Standard Error			303.8	3.48584	0.09026		830.922	14.7217	0.0611309		862.547	6.31365	0.189624
	p value (t-test) MBP vs. MBP+hBT			0.128953	0.655214	0.720814		0.0923621	0.0318802	0.0908992		0.119799	0.483146	0.815309
